# Supplementary material
Source: publisher figshare collection journal article supplement (https://diabetesjournals.figshare.com/ndownloader/files/35276137)
Supplement: Supplementary file 1 [file 35276137]

## Supplementary Materials

### Supplementary Methods

As an independent replication, we also analyzed the associations of dietary protein sources with T2D risk in 34,616 men and women who were free of diabetes at baseline with a median follow-up period of 11.4 years in the UKB prospective cohort. The detailed information of UKB has been introduced elsewhere.(1) In the UKB, food intake was assessed via internet-based administration of the Oxford WebQ, which is a 24-h recall of frequency from a set food list including >200 food items frequently consumed in the UK and took seasonal variations into consideration.(2; 3) Energy and nutrient values were calculated according to McCance and Widdowson's The Composition of Foods.(3) Compared with an interviewer-based 24h dietary recall, the Spearman's correlation for the majority of nutrients obtained from the WebQ ranged between 0.5 and 0.9, with 0.6 for protein.(2) A total of five rounds of assessment were completed on the recruitment assessment between April 2009 and September 2010 followed by four times of repeated measurements between February 2011 and June 2012.(4) To better reflect dietary habits, we included the participants with at least four rounds of dietary assessments in the current analysis. The average dietary intakes of the four repeated measurements were used in the analysis. The food items included in each of the 12 dietary protein sources were described in **Supplementary Table S2**.(5) In the UKB, incident T2D cases were ascertained using cumulative medical records of hospital diagnoses. T2D was defined by the International Classification of Diseases 10 code E11 (Non-insulin-dependent diabetes mellitus).(6)

We used Cox proportional hazard models to examine the associations of intake of one serving/day of dietary protein sources with risk of incident T2D, with adjustment for age, sex, residence area, Townsend deprivation index at recruitment, smoking status, drinking status, physical activity, family history of diabetes, multivitamin use, antihypertensive medication treatment, total energy intake, and other protein sources. Based on this model, we further calculated the HRs of T2D for protein sources substitution as the exponentiated difference between the coefficients of the two foods involved in substitution. The corresponding 95% confidence intervals (CIs) of HRs were calculated based on variance-covariance matrix.

**Supplementary Table S1. Definition of dietary protein sources according to MyPyramid Equivalents Database in WHI<sup>1-4</sup>**

| Protein sources      | MPED Description                                                                                                                                                              |
|----------------------|-------------------------------------------------------------------------------------------------------------------------------------------------------------------------------|
| Red meat             | M_Meat: Ounces of cooked lean meat from beef, pork, veal, lamb, and game, excludes lean meat organ meats and frankfurters, sausages, and luncheon meat                        |
| Processed meat       | M_Frank: Ounces of cooked lean meat from frankfurters, sausages, and luncheon meats                                                                                           |
| Poultry              | M_Poult: Ounces of cooked lean meat from chicken, turkey, and other poultry. Excludes poultry organ meats and poultry present in frankfurters, sausages, and luncheon meats   |
| Eggs                 | M_Egg: Number of ounce equivalents, where one egg is one ounce equivalent of cooked lean meat. Includes eggs and egg substitutes                                              |
| High omega-3 seafood | M_Fish_Hi: Ounces of cooked lean meat from fish, shellfish, and other seafood that are high in the n-3 fatty acids eicosapentaenoic acid (EPA) and docosahexaenoic acid (DHA) |
| Low omega-3 seafood  | M_Fish_Lo: Ounces of cooked lean meat from fish, shellfish, and other seafood that are low in the n-3 fatty acids eicosapentaenoic acid (EPA) and docosahexaenoic acid (DHA)  |
| Cheese               | D_Cheese: Number of cup equivalents of cheese. Includes natural and processed cheese                                                                                          |
| Milk                 | D_Milk: Number of cup equivalents of milk                                                                                                                                     |
| Yogurt               | D_Yogurt: Number of cup equivalents of yogurt                                                                                                                                 |
| Whole grains         | G_Whl: Number of ounce equivalents of whole grains from the grains group                                                                                                      |
| Legumes              | Legumes: Number of cup equivalents of cooked dry beans and peas                                                                                                               |
| Nuts                 | M_NutSd: Number of ounce equivalents of cooked lean meat from nuts and seeds, where ½ ounce of nuts and seeds is one ounce equivalent of cooked lean meat                     |

<sup>1</sup> MyPyramid recommends making lean or low-fat food choices from the meat and beans group. Lean meat is defined as any meat, poultry, fish food item that contains 9.28 grams or less fat and at least 90.72 grams of nonfat meat component per 100 grams of cooked food item. Equivalents of cooked meat, poultry, fish were translated into the amount of meat contains 9.28 grams per 100 grams of food.

<sup>2</sup> High omega-3 is defined as a n-3 fatty acids eicosapentaenoic acid (EPA) and docosahexaenoic acid (DHA) in amounts at or above 0.5 gram per 85 grams (3 ounces).

<sup>3</sup> Low omega-3 is defined as a n-3 fatty acids eicosapentaenoic acid (EPA) and docosahexaenoic acid (DHA) in amounts under 0.5 gram per 85 grams (3 ounces).

<sup>4</sup> Foods for which details on grain ingredients are not available to make a determination about the grain subgroups, Agricultural Research Service's Nutrient Data Laboratory food specialists provided guidance on determining the proportion of whole grain components present in a grain product.

**Supplementary Table S2. Definition of dietary protein sources in the UKB**

| <b>Protein sources</b> | <b>Food items</b>                                                                                                                                              |
|------------------------|----------------------------------------------------------------------------------------------------------------------------------------------------------------|
| Red meat               | Beef, lamb, pork                                                                                                                                               |
| Processed meat         | Sausage, bacon, ham                                                                                                                                            |
| Poultry                | Crumbed chicken, chicken, poultry                                                                                                                              |
| Eggs                   | Whole eggs, omelets, eggs disaggregated from mayonnaise in egg sandwiches                                                                                      |
| High omega-3 seafood   | Oily fish                                                                                                                                                      |
| Low omega-3 seafood    | White fish, breaded fish, battered fish, tinned tuna                                                                                                           |
| Cheese                 | Low fat hard cheese, hard cheese, soft cheese, blue cheese, low fat cheese spread, cheese spread, cottage cheese, mozzarella cheese, goat cheese, other cheese |
| Milk                   | Whole milk, semi-skimmed milk, skimmed milk, powdered milk, goat/sheep milk                                                                                    |
| Yogurt                 | Yogurt                                                                                                                                                         |
| Whole grains           | Muesli, oat crunch, bran cereal, whole wheat cereal, oatcake, couscous, whole meal pasta, brown rice                                                           |
| Legumes                | Baked beans, pulses                                                                                                                                            |
| Nuts                   | Salted peanuts, unsalted peanuts, salted other nuts, unsalted other nuts, seeds                                                                                |

**Supplementary Table S3. Baseline characteristics of participants according to quintiles of energy-adjusted total protein intake in the UKB**

|                                                  | Total                | Quintiles of energy-adjusted total protein intake |                      |                      |                      |                      |
|--------------------------------------------------|----------------------|---------------------------------------------------|----------------------|----------------------|----------------------|----------------------|
|                                                  |                      | Q1                                                | Q2                   | Q3                   | Q4                   | Q5                   |
| N                                                | 34,616               | 6924                                              | 6923                 | 6923                 | 6923                 | 6923                 |
| Men, n (%)                                       | 14,902 (43.0)        | 3268 (47.2)                                       | 3022 (43.7)          | 2918 (42.1)          | 2779 (40.1)          | 2915 (42.1)          |
| Follow-up duration (Person-years)                | 393,584              | 78,897                                            | 78,845               | 78,755               | 78,755               | 78,335               |
| Incident diabetes, n (%)                         | 663 (1.9)            | 107 (1.5)                                         | 131 (1.9)            | 118 (1.7)            | 127 (1.8)            | 180 (2.6)            |
| Age at baseline, median (IQR), yr                | 58.0 (51.0, 62.0)    | 57.0 (50.0, 62.0)                                 | 58.0 (51.0, 63.0)    | 58.0 (51.0, 63.0)    | 58.0 (52.0, 63.0)    | 57.0 (50.0, 62.0)    |
| White ethnicity, n (%)                           | 33762 (97.5)         | 6733 (97.2)                                       | 6770 (97.8)          | 6773 (97.8)          | 6772 (97.8)          | 6714 (97.0)          |
| College or University degree, n (%)              | 19068 (55.1)         | 4001 (57.8)                                       | 3946 (57.0)          | 3856 (55.7)          | 3688 (53.3)          | 3577 (51.7)          |
| Physical activity (METs-h/wk), median (IQR)      | 28.3 (13.7, 53.0)    | 28.6 (13.8, 53.1)                                 | 28.2 (13.6, 51.2)    | 27.6 (13.8, 51.5)    | 28.3 (14.0, 55.0)    | 28.8 (13.6, 54.2)    |
| Current drinker, n (%)                           | 32566 (94.1)         | 6471 (93.5)                                       | 6517 (94.1)          | 6550 (94.6)          | 6527 (94.3)          | 6501 (93.9)          |
| Current smoker, n (%)                            | 2163 (6.2)           | 582 (8.4)                                         | 447 (6.5)            | 360 (5.2)            | 397 (5.7)            | 377 (5.4)            |
| Townsend deprivation index, median (IQR)         | -2.3 (-3.7, -0.0)    | -2.0 (-3.6, 0.5)                                  | -2.3 (-3.7, -0.0)    | -2.4 (-3.7, -0.2)    | -2.4 (-3.8, -0.3)    | -2.4 (-3.8, -0.0)    |
| Area, n (%)                                      |                      |                                                   |                      |                      |                      |                      |
| England                                          | 31914 (92.2)         | 6318 (91.2)                                       | 6346 (91.7)          | 6410 (92.6)          | 6413 (92.6)          | 6427 (92.8)          |
| Scotland                                         | 1653 (4.8)           | 376 (5.4)                                         | 357 (5.2)            | 334 (4.8)            | 309 (4.5)            | 277 (4.0)            |
| Wales                                            | 1049 (3.0)           | 230 (3.3)                                         | 220 (3.2)            | 179 (2.6)            | 201 (2.9)            | 219 (3.2)            |
| Multivitamin use, n (%)                          | 8097 (23.4)          | 1686 (24.4)                                       | 1540 (22.2)          | 1533 (22.1)          | 1623 (23.4)          | 1715 (24.8)          |
| Antihypertension medication used, n (%)          | 5861 (16.9)          | 1068 (15.4)                                       | 1124 (16.2)          | 1161 (16.8)          | 1200 (17.3)          | 1308 (18.9)          |
| Family history of diabetes, n (%)                | 7168 (20.7)          | 1367 (19.7)                                       | 1367 (19.7)          | 1358 (19.6)          | 1481 (21.4)          | 1595 (23.0)          |
| Body mass index, median (IQR), kg/m <sup>2</sup> | 25.7 (23.3, 28.7)    | 25.1 (22.8, 27.9)                                 | 25.4 (23.0, 28.2)    | 25.7 (23.3, 28.7)    | 25.8 (23.5, 28.8)    | 26.5 (24.0, 29.7)    |
| Total energy intake, median (IQR), kcal/day      | 2058 (1773, 2386)    | 2127 (1811, 2467)                                 | 2045 (1761, 2375)    | 2031 (1757, 2340)    | 2019 (1754, 2338)    | 2074 (1784, 2421)    |
| Total carbohydrate, median (IQR), g/day          | 247.3 (208.2, 291.3) | 264.9 (222.1, 311.6)                              | 250.0 (211.3, 293.9) | 244.8 (207.1, 285.7) | 240.2 (204.1, 281.7) | 238.7 (198.4, 281.8) |
| Total fat, median (IQR), g/day                   | 75.8 (61.4, 92.2)    | 79.1 (63.4, 96.0)                                 | 76.0 (61.2, 91.8)    | 74.8 (61.0, 90.5)    | 73.9 (60.3, 89.2)    | 75.7 (61.4, 93.8)    |
| Total protein, median (IQR), g/day               | 80.4 (69.2, 92.6)    | 65.9 (56.6, 76.1)                                 | 73.3 (64.9, 82.8)    | 79.2 (71.1, 88.0)    | 85.2 (77.3, 94.6)    | 98.2 (88.4, 110.4)   |
| Dietary protein sources, median (IQR), g/day     |                      |                                                   |                      |                      |                      |                      |

|                      |                      |                     |                      |                      |                      |                      |
|----------------------|----------------------|---------------------|----------------------|----------------------|----------------------|----------------------|
| Red meat             | 30.0 (0.0, 60.0)     | 0.0 (0.0, 30.0)     | 30.0 (0.0, 45.0)     | 30.0 (0.0, 60.0)     | 30.0 (24.0, 60.0)    | 60.0 (30.0, 90.0)    |
| Processed meat       | 11.5 (0.0, 25.9)     | 5.8 (0.0, 20.8)     | 9.2 (0.0, 23.0)      | 11.5 (0.0, 25.9)     | 11.5 (0.0, 27.2)     | 14.4 (0.0, 34.5)     |
| Eggs                 | 12.5 (0.0, 30.0)     | 0.0 (0.0, 25.0)     | 6.2 (0.0, 25.0)      | 12.0 (0.0, 30.0)     | 12.5 (0.0, 30.0)     | 15.0 (0.0, 42.5)     |
| Poultry              | 32.5 (0.0, 52.0)     | 0.0 (0.0, 32.5)     | 26.0 (0.0, 32.5)     | 32.5 (0.0, 48.8)     | 32.5 (13.0, 65.0)    | 48.8 (32.5, 81.2)    |
| High omega-3 seafood | 0.0 (0.0, 25.0)      | 0.0 (0.0, 12.5)     | 0.0 (0.0, 25.0)      | 0.0 (0.0, 25.0)      | 0.0 (0.0, 25.0)      | 0.0 (0.0, 25.0)      |
| Low omega-3 seafood  | 0.0 (0.0, 30.0)      | 0.0 (0.0, 23.0)     | 0.0 (0.0, 25.0)      | 0.0 (0.0, 30.0)      | 0.0 (0.0, 30.0)      | 0.0 (0.0, 30.0)      |
| Cheese               | 15.0 (5.0, 25.0)     | 15.0 (5.0, 26.2)    | 15.0 (5.0, 25.0)     | 15.0 (5.0, 25.0)     | 15.0 (5.0, 25.0)     | 15.0 (5.0, 28.8)     |
| Milk                 | 187.5 (105.0, 258.2) | 156.2 (70.0, 228.8) | 181.2 (100.0, 250.0) | 190.0 (113.8, 257.5) | 200.0 (122.5, 271.1) | 207.0 (124.5, 283.8) |
| Yogurt               | 62.5 (0.0, 125.0)    | 50.0 (0.0, 125.0)   | 62.5 (0.0, 125.0)    | 62.5 (0.0, 125.0)    | 62.5 (0.0, 156.2)    | 62.5 (0.0, 187.5)    |
| Whole grains         | 49.0 (20.0, 86.0)    | 46.5 (18.0, 84.5)   | 49.2 (20.0, 85.0)    | 50.0 (20.0, 85.2)    | 50.8 (20.0, 87.0)    | 48.5 (19.0, 86.9)    |
| Legumes              | 0.0 (0.0, 17.5)      | 0.0 (0.0, 17.5)     | 0.0 (0.0, 17.5)      | 0.0 (0.0, 17.5)      | 0.0 (0.0, 17.5)      | 0.0 (0.0, 25.3)      |
| Nuts                 | 0.0 (0.0, 10.0)      | 0.0 (0.0, 10.0)     | 0.0 (0.0, 8.0)       | 0.0 (0.0, 8.0)       | 0.0 (0.0, 8.0)       | 0.0 (0.0, 10.0)      |

---

Data are presented as median (inter-quartile range, IQR) for non-normally distributed variables, and numbers (percentages) for categorical variables.

**Supplementary Table S4. Associations of dietary protein and food sources with risk of incident type 2 diabetes in the UKB**

|                                   | HR (95% CI)       |                   |
|-----------------------------------|-------------------|-------------------|
|                                   | Full Model        | Sensitivity Model |
| Total protein, 5% of energy       | 1.36 (1.17, 1.57) | 1.14 (0.99, 1.32) |
| Red meat, serving/day             | 1.19 (1.07,1.31)  | 1.08 (0.97,1.19)  |
| Processed meat, serving/day       | 1.35 (1.14,1.59)  | 1.11 (0.93,1.31)  |
| Poultry, serving/day              | 1.13 (1.02,1.25)  | 1.06 (0.95,1.17)  |
| Eggs, serving/day                 | 1.12 (0.99,1.28)  | 1.03 (0.90,1.18)  |
| Cheese, serving/day               | 0.92 (0.79,1.07)  | 0.89 (0.77,1.04)  |
| Milk, serving/day                 | 1.16 (1.02,1.31)  | 1.18 (1.04,1.34)  |
| Yogurt, serving/day               | 0.94 (0.89,1.00)  | 0.93 (0.88,0.99)  |
| High omega-3 seafood, serving/day | 0.97 (0.79,1.19)  | 1.01 (0.83,1.24)  |
| Low omega-3 seafood, serving/day  | 0.97 (0.82,1.15)  | 0.92 (0.78,1.09)  |
| Whole grains, serving/day         | 0.94 (0.90,0.99)  | 0.98 (0.93,1.03)  |
| Legumes, serving/day              | 1.08 (0.91,1.27)  | 1.05 (0.89,1.25)  |
| Nuts, serving/day                 | 0.96 (0.89,1.02)  | 0.98 (0.92,1.05)  |

In the full Model, HR of type 2 diabetes for dietary protein and food sources were calculated by using Cox proportional hazard models with adjustment for age, sex, residence area, Townsend deprivation index at recruitment, smoking status, drinking status, physical activity, family history of diabetes, multivitamin use, antihypertensive medication treatment, total energy intake, and other protein sources.

In the sensitivity Model, BMI and WHR were additionally adjusted.

**Supplementary Table S5. Sensitivity analysis of the associations of substitution of different protein and food sources with risk of incident type 2 diabetes with additional adjustment for BMI and WHR in the WHI and the UKB<sup>1-3</sup>**

| Substituted protein              | Equivalent amount of substituted protein | WHI HR (95% CI)   | UKB HR (95% CI)   |
|----------------------------------|------------------------------------------|-------------------|-------------------|
| 5% of energy from animal protein | Plant protein                            | 0.89 (0.84, 0.95) | NA                |
| 1 serving/day of red meat        | Whole grains                             | 0.92 (0.89, 0.94) | 0.91 (0.82, 1.02) |
|                                  | Nuts                                     | 0.97 (0.94, 0.99) | 0.92 (0.81, 1.03) |
|                                  | Legumes                                  | 1.00 (0.96, 1.04) | 0.98 (0.80, 1.19) |
|                                  | Yogurt                                   | 0.96 (0.93, 0.99) | 0.87 (0.77, 0.97) |
|                                  | Milk                                     | 0.96 (0.93, 0.98) | 1.10 (0.93, 1.29) |
|                                  | Cheese                                   | 0.96 (0.94, 0.98) | 0.83 (0.70, 0.98) |
|                                  | High-omega 3 seafood                     | 1.00 (0.92, 1.07) | 0.94 (0.76, 1.17) |
|                                  | Low-omega 3 seafood                      | 1.13 (1.03, 1.23) | 0.85 (0.71, 1.02) |
| 1 serving/day of processed meat  | Whole grains                             | 0.85 (0.80, 0.90) | 0.89 (0.75, 1.05) |
|                                  | Nuts                                     | 0.90 (0.85, 0.95) | 0.89 (0.74, 1.06) |
|                                  | Legumes                                  | 0.93 (0.87, 0.98) | 0.95 (0.74, 1.22) |
|                                  | Yogurt                                   | 0.89 (0.84, 0.94) | 0.84 (0.70, 1.01) |
|                                  | Milk                                     | 0.89 (0.84, 0.94) | 1.07 (0.86, 1.32) |
|                                  | Cheese                                   | 0.89 (0.84, 0.94) | 0.81 (0.65, 1.00) |
|                                  | High-omega 3 seafood                     | 0.92 (0.84, 1.01) | 0.92 (0.71, 1.18) |
|                                  | Low-omega 3 seafood                      | 1.04 (0.94, 1.16) | 0.83 (0.66, 1.05) |
| 1 serving/day of eggs            | Whole grains                             | 0.84 (0.80, 0.87) | 0.95 (0.83, 1.09) |
|                                  | Nuts                                     | 0.88 (0.85, 0.92) | 0.95 (0.82, 1.11) |
|                                  | Legumes                                  | 0.92 (0.87, 0.96) | 1.02 (0.82, 1.27) |
|                                  | Yogurt                                   | 0.88 (0.84, 0.92) | 0.90 (0.78, 1.04) |
|                                  | Milk                                     | 0.88 (0.84, 0.91) | 1.15 (0.96, 1.37) |
|                                  | Cheese                                   | 0.88 (0.84, 0.91) | 0.87 (0.71, 1.06) |
|                                  | High-omega 3 seafood                     | 0.91 (0.84, 0.99) | 0.98 (0.77, 1.26) |
|                                  | Low-omega 3 seafood                      | 1.03 (0.94, 1.14) | 0.89 (0.72, 1.10) |
| 1 serving/day of poultry         | Whole grains                             | 0.92 (0.88, 0.96) | 0.93 (0.83, 1.04) |
|                                  | Nuts                                     | 0.97 (0.94, 1.01) | 0.93 (0.82, 1.05) |
|                                  | Legumes                                  | 1.01 (0.96, 1.06) | 1.00 (0.82, 1.21) |
|                                  | Yogurt                                   | 0.97 (0.93, 1.01) | 0.88 (0.78, 0.99) |
|                                  | Milk                                     | 0.96 (0.93, 1.00) | 1.12 (0.95, 1.31) |
|                                  | Cheese                                   | 0.96 (0.93, 1.00) | 0.84 (0.71, 1.00) |
|                                  | High-omega 3 seafood                     | 1.00 (0.92, 1.09) | 0.96 (0.77, 1.20) |
|                                  | Low-omega 3 seafood                      | 1.13 (1.03, 1.25) | 0.87 (0.72, 1.05) |

<sup>1</sup> One serving size was defined as 50g/day for red meat, processed meat, eggs, high omega-3 seafood, low omega-3 seafood, and legumes; 30g/day for cheese and whole grains; 200g/day for milk; 70g/day for yogurt; and 10g/day for nuts.



<sup>2</sup>In the WHI, the substitution analysis models were adjusted for age, study group indicator, self-identified race/ethnicity, region of residence, family income, education, and family history of diabetes, smoking status, alcohol intake, physical activity, hormone replacement therapy, multivitamin use, antihypertensive medication use, total energy intake, modified Alternate Healthy Eating Index (AHEI) 2010, other protein sources, BMI, and WHR.

<sup>3</sup>In the UKB, the substitution analyses were adjusted for age, sex, residence area, Townsend deprivation index at recruitment, smoking status, drinking status, physical activity, family history of diabetes, multivitamin use, antihypertensive medication treatment, total energy intake, other protein sources, BMI, and WHR.

NA: In the UKB, only total protein was calculated and released. The variables of animal protein and plant protein intake were not available in the UKB database; therefore, the according substitution analysis cannot be conducted.

Abbreviations: WHI, Women's Health Initiative; UKB, United Kingdom Biobank.

**Supplementary Table S6. Baseline characteristics of 3464 postmenopausal women enrolled in the case-control studies nested in the WHI**

|                                    | Control       | Case          | <i>P</i> value |
|------------------------------------|---------------|---------------|----------------|
| N                                  | 2019          | 1445          |                |
| Age at baseline (yr)               | 62 ± 7        | 63 ± 7        | 0.18           |
| Race, n (%)                        |               |               | <0.001         |
| White                              | 150 (7.4 %)   | 77 (5.3 %)    |                |
| Black                              | 256 (12.7 %)  | 119 (8.2 %)   |                |
| Others/unknown                     | 1613 (79.9 %) | 1249 (86.4 %) |                |
| Region of residence, n (%)         |               |               | 0.39           |
| Northeast                          | 364 (18.0 %)  | 282 (19.5 %)  |                |
| South                              | 686 (34.0 %)  | 472 (32.7 %)  |                |
| Midwest                            | 430 (21.3 %)  | 328 (22.7 %)  |                |
| West                               | 539 (26.7 %)  | 363 (25.1 %)  |                |
| Education, n (%)                   |               |               | <0.001         |
| <High school                       | 1169 (57.9 %) | 986 (68.2 %)  |                |
| High school                        | 830 (41.1 %)  | 445 (30.8 %)  |                |
| ≥College                           | 20 (1 %)      | 14 (1 %)      |                |
| Physical activity (METs-h/wk)      | 13.3 ± 14.3   | 9.7 ± 12.4    | <0.001         |
| Alcohol intake (g/day)             | 4.2 ± 10.6    | 2.5 ± 6.9     | <0.001         |
| Smoking status, n (%)              |               |               | 0.05           |
| Never smoked                       | 1114 (55.2 %) | 738 (51.1 %)  |                |
| Past smoker                        | 775 (38.4 %)  | 599 (41.5 %)  |                |
| Current smoker                     | 130 (6.4 %)   | 108 (7.5 %)   |                |
| Income (U.S. dollars)              |               |               | <0.001         |
| <20,000                            | 314 (15.6 %)  | 317 (21.9 %)  |                |
| 20,000-49,999                      | 989 (49.0 %)  | 735 (50.9 %)  |                |
| >50,000                            | 716 (35.5 %)  | 393 (27.2 %)  |                |
| Family history of diabetes, n (%)  | 691 (34.2 %)  | 776 (53.7 %)  | <0.001         |
| Multivitamin use, n (%)            | 66 (3.3 %)    | 43 (3.0 %)    | 0.70           |
| Hormone replacement therapy, n (%) |               |               | <0.001         |
| Never                              | 704 (34.9 %)  | 591 (40.9 %)  |                |
| Past                               | 399 (19.8 %)  | 327 (22.6 %)  |                |
| Current                            | 916 (45.4 %)  | 527 (36.5 %)  |                |
| Antihypertension medicine, n (%)   |               |               | <0.001         |
| Never treated                      | 1358 (67.3 %) | 675 (46.7 %)  |                |
| Previously treated                 | 150 (7.4 %)   | 154 (10.7 %)  |                |
| Currently treated                  | 511 (25.3 %)  | 616 (42.6 %)  |                |
| Total energy intake (kcal/day)     | 1555 ± 651    | 1688 ± 712    | <0.001         |
| Total carbohydrate (g/day)         | 203.5 ± 82.3  | 208.9 ± 78.7  | 0.05           |
| Total fat (g/day)                  | 54.2 ± 31.7   | 62.5 ± 33.6   | <0.001         |

|                                                  |               |               |        |
|--------------------------------------------------|---------------|---------------|--------|
| Saturated fat                                    | 17.7 ± 11.1   | 20.7 ± 11.8   | <0.001 |
| Monounsaturated fat                              | 20.6 ± 12.4   | 23.7 ± 13.0   | <0.001 |
| Polyunsaturated fat                              | 11.5 ± 7.0    | 13.0 ± 7.3    | <0.001 |
| Total protein (g/day)                            | 63.7 ± 29.2   | 69.4 ± 27.6   | <0.001 |
| Animal protein                                   | 43.8 ± 24.1   | 48.9 ± 22.4   | <0.001 |
| Plant protein                                    | 19.8 ± 8.9    | 20.4 ± 8.4    | 0.06   |
| Dietary protein food source (g/day) <sup>1</sup> |               |               |        |
| Red meat                                         | 36.4 ± 34.8   | 47.7 ± 42.1   | <0.001 |
| Processed meat                                   | 10.2 ± 13.7   | 15.0 ± 18.8   | <0.001 |
| Eggs                                             | 14.6 ± 18.3   | 19.0 ± 23.6   | <0.001 |
| Poultry                                          | 27.5 ± 25.2   | 29.1 ± 25.9   | 0.07   |
| High omega-3 seafood                             | 8.9 ± 11.3    | 7.9 ± 10.2    | 0.01   |
| Low omega-3 seafood                              | 8.6 ± 10.2    | 9.3 ± 10.1    | 0.07   |
| Cheese                                           | 91.2 ± 110    | 106.2 ± 104.9 | <0.001 |
| Milk                                             | 221.4 ± 262.1 | 235.3 ± 245   | 0.11   |
| Yogurt                                           | 36.8 ± 68.4   | 36.9 ± 68.2   | 0.98   |
| Whole grains                                     | 32.7 ± 29.0   | 32.5 ± 28.5   | 0.84   |
| Legumes                                          | 21.1 ± 28.6   | 21.2 ± 32.7   | 0.87   |
| Nuts                                             | 8.7 ± 14.8    | 10 ± 17.7     | 0.03   |
| Modified AHEI 2010                               | 34.7 ± 8.1    | 33.3 ± 8.2    | <0.001 |

<sup>1</sup>Units of protein source, which vary by MPED group, were transformed to g/day in analysis.

Continuous variables are presented as mean ± SD. Categorical variables are presented as n (%).

*P* values were calculated with Chi-square test for categorical variables and t test for continuous variables.

Abbreviations: BMI, body mass index; METs, metabolic equivalent of task; AHEI, alternative healthy eating index.

**Supplementary Table S7. Circulating levels of biomarkers among postmenopausal women enrolled in the case-control studies nested in the WHI**

|                                     | N    | Control     | Case        | P value |
|-------------------------------------|------|-------------|-------------|---------|
| <b>Obesity-related measurements</b> |      |             |             |         |
| BMI, kg/m <sup>2</sup>              | 3420 | 27.5 ± 5.86 | 32.3 ± 7.05 | <0.001  |
| Waist circumference, cm             | 3451 | 83.9 ± 12.8 | 97.9 ± 15.5 | <0.001  |
| <b>Inflammation factors</b>         |      |             |             |         |
| TNFα-R2, pg/mL                      | 3004 | 2479 ± 795  | 2809 ± 881  | <0.001  |
| IL-6, pg/mL                         | 3015 | 2.77 ± 4.45 | 4.17 ± 5.36 | <0.001  |
| hs-CRP, mg/L                        | 3024 | 0.38 ± 0.55 | 0.68 ± 1.45 | <0.001  |
| <b>Endothelial dysfunction</b>      |      |             |             |         |
| VCAM-1, ng/ml                       | 3012 | 714 ± 243   | 804 ± 308   | <0.001  |
| E-selectin, ng/ml                   | 3005 | 39.6 ± 20.1 | 55.5 ± 31.7 | <0.001  |
| SICAM-1, ng/ml                      | 2984 | 284 ± 89.2  | 334 ± 109   | <0.001  |
| <b>Sex steroids and SHBG</b>        |      |             |             |         |
| Estradiol, pg/mL                    | 1471 | 31.9 ± 44.2 | 29.6 ± 38.9 | 0.42    |
| Testosterone, mg/mL                 | 1471 | 0.15 ± 0.18 | 0.18 ± 0.22 | 0.002   |
| SHBG, nmol/L                        | 1471 | 89.7 ± 56.1 | 58.3 ± 46.6 | <0.001  |
| <b>Leptin and leptin receptor</b>   |      |             |             |         |
| Leptin, ng/ml                       | 1472 | 30.0 ± 21.2 | 36.9 ± 24.3 | <0.001  |
| Soluble leptin receptor, ng/ml      | 1472 | 35.5 ± 11.4 | 33.7 ± 10.4 | 0.006   |
| <b>Cellular aging</b>               |      |             |             |         |
| Leucocyte telomere length, kb       | 3368 | 4.09 ± 1.44 | 3.95 ± 1.44 | 0.06    |

variables are presented as mean ± SD. *P* values were calculated using logistic regression model with adjustment for age, self-identified race/ethnicity, region of residence at baseline, family income, and education.

Abbreviation: hs-CRP, high-sensitivity C-reactive protein; SICAM-1, soluble intercellular adhesion molecule 1; SHBG, sex hormone-binding globulin; TNFα-R2, tumor necrosis factor α receptor 2; VCAM-1, vascular cell adhesion molecule 1.

**Supplementary Table S8. Mediating effects of biomarkers on the association of iso-caloric substitution of plant protein for animal protein with risk of type 2 diabetes with adjustment for BMI among postmenopausal women enrolled in the nested case-control studies in the WHI<sup>1-2</sup>**

| Substituting 5% energy from plant protein for 5% energy from animal protein → T2D |      |                              |                                 |                               |                           |
|-----------------------------------------------------------------------------------|------|------------------------------|---------------------------------|-------------------------------|---------------------------|
| Mediators                                                                         | N    | Total effect,<br>OR (95% CI) | Indirect effect,<br>OR (95% CI) | Direct effect,<br>OR (95% CI) | Proportion mediated,<br>% |
| <b>Inflammation factors</b>                                                       |      |                              |                                 |                               |                           |
| TNFR2                                                                             | 2771 | 1.04 (0.71, 1.53)            | 1.00 (0.96, 1.03)               | 1.04 (0.71, 1.54)             | NA                        |
| IL-6                                                                              | 2780 | 1.02 (0.71, 1.54)            | 0.95 (0.90, 1.01)               | 1.08 (0.74, 1.64)             | NA                        |
| hs-CRP                                                                            | 2786 | 1.02 (0.68, 1.48)            | 0.91 (0.84, 0.98)               | 1.13 (0.74, 1.63)             | NA                        |
| Inflammation score                                                                | 2769 | 1.03 (0.71, 1.49)            | 0.96 (0.89, 1.02)               | 1.08 (0.75, 1.59)             | NA                        |
| <b>Endothelial dysfunction</b>                                                    |      |                              |                                 |                               |                           |
| VCAM-1                                                                            | 2778 | 1.04 (0.69, 1.54)            | 1.01 (0.98, 1.05)               | 1.03 (0.68, 1.52)             | 2                         |
| E-selectin                                                                        | 2772 | 1.12 (0.76, 1.69)            | 0.98 (0.90, 1.08)               | 1.14 (0.78, 1.71)             | NA                        |
| SICAM-1                                                                           | 2752 | 1.10 (0.76, 1.63)            | 1.05 (0.98, 1.12)               | 1.05 (0.73, 1.57)             | 18                        |
| <b>Sex steroids and SHBG</b>                                                      |      |                              |                                 |                               |                           |
| Estradiol                                                                         | 1402 | 0.98 (0.62, 1.52)            | 1.00 (0.96, 1.01)               | 0.99 (0.62, 1.54)             | NA                        |
| Testosterone                                                                      | 1402 | 0.98 (0.61, 1.52)            | 1.00 (0.95, 1.05)               | 0.98 (0.62, 1.52)             | NA                        |
| SHBG                                                                              | 1402 | 1.02 (0.63, 1.62)            | 0.97 (0.86, 1.10)               | 1.05 (0.65, 1.65)             | 2                         |
| <b>Leptin and leptin receptor</b>                                                 |      |                              |                                 |                               |                           |
| Leptin                                                                            | 1403 | 1.00 (0.63, 1.56)            | 0.99 (0.94, 1.04)               | 1.00 (0.64, 1.57)             | 1                         |
| Soluble leptin receptor                                                           | 1403 | 0.99 (0.62, 1.57)            | 1.01 (0.99, 1.06)               | 0.97 (0.61, 1.54)             | NA                        |
| <b>Cellular aging</b>                                                             |      |                              |                                 |                               |                           |
| Leucocyte telomere length                                                         | 3101 | 0.99 (0.68, 1.42)            | 1.00 (0.98, 1.01)               | 0.99 (0.68, 1.43)             | NA                        |

<sup>1</sup> The covariates adjusted in the mediation analyses included age, ethnicity, education, smoking, drinking, physical activity, and BMI.

<sup>2</sup> Proportion mediated was not calculated when the point estimate of the direct effect was in an opposite direction as the indirect effect.

Inflammation score was calculated by summing up inflammation markers above the median value.

Abbreviations: WHI, Women's Health Initiative; T2D, type 2 diabetes mellitus; BMI, body mass index; TNF $\alpha$ -R2, tumor necrosis factor receptor 2; IL-6, interleukin 6; hs-CRP, high-sensitivity C-reactive protein; VCAM-1, vascular cell adhesion protein 1; SICAM-1, soluble intercellular adhesion molecule-1; SHBG, sex hormone-binding globulin.

## Reference

1. Sudlow C, Gallacher J, Allen N, et al. UK biobank: an open access resource for identifying the causes of a wide range of complex diseases of middle and old age. *PLoS Med* 2015;12:e1001779
2. Liu B, Young H, Crowe FL, et al. Development and evaluation of the Oxford WebQ, a low-cost, web-based method for assessment of previous 24 h dietary intakes in large-scale prospective studies. *Public Health Nutr* 2011;14:1998-2005
3. Galante J, Adamska L, Young A, et al. The acceptability of repeat Internet-based hybrid diet assessment of previous 24-h dietary intake: administration of the Oxford WebQ in UK Biobank. *Br J Nutr* 2016;115:681-686
4. Bradbury KE, Young HJ, Guo W, et al. Dietary assessment in UK Biobank: an evaluation of the performance of the touchscreen dietary questionnaire. *J Nutr Sci* 2018;7:e6
5. Bradbury KE, Tong TYN, Key TJ. Dietary Intake of High-Protein Foods and Other Major Foods in Meat-Eaters, Poultry-Eaters, Fish-Eaters, Vegetarians, and Vegans in UK Biobank. *Nutrients* 2017;9
6. Eastwood SV, Mathur R, Atkinson M, et al. Algorithms for the Capture and Adjudication of Prevalent and Incident Diabetes in UK Biobank. *PLoS One* 2016;11:e0162388
